# Supplementary material for: Antimicrobial Susceptibility of Enterococcus Isolates from Cattle and Pigs in Portugal: Linezolid Resistance Genes optrA and poxtA
Source: MDPI journal article supplement (doi:10.3390/antibiotics11050615), 2022-05-03
Supplement: s1 [file s1]

## Supplementary Materials

**Table S1.** Description of primer sets, annealing temperature and DNA from control strains used for the molecular species identification of *Enterococcus* spp.

| Target taxon            | Target genes | Primers | Sequence (5'-3')       | Amplicon size | Annealing temperature | PCR-Positive control strain | Ref |
|-------------------------|--------------|---------|------------------------|---------------|-----------------------|-----------------------------|-----|
| <i>Enterococcus</i>     | 16S rRNA     | E1      | TCAACCGGGGAGGGT        | 733 bp        | 55°C                  | ATCC 29212                  | 79  |
|                         |              | E2      | ATTACTAGCGATTCCGG      |               |                       |                             |     |
| <i>E. faecalis</i>      | <i>sodA</i>  | FL1     | ACTTATGTGACTAACTTAACC  | 360 bp        | 55°C                  | ATCC 29212                  | 80  |
|                         |              | FL2     | TAATGGTGAATCTTGGTTTGG  |               |                       |                             |     |
| <i>E. faecium</i>       | <i>sodA</i>  | FM1     | GAAAAAACAATAGAAGAATTAT | 215 bp        | 55°C                  | INIAV 127P                  | 80  |
|                         |              | FM2     | TGCTTTTTTGAATTCTTCTTTA |               |                       |                             |     |
| <i>E. hirae</i>         | <i>sodA</i>  | HI1     | CTTTCTGATATGGATGCTGTC  | 187 bp        | 48°C                  | INIAV 27P                   | 80  |
|                         |              | HI2     | TAAATTCTTCCTTAAATGTTG  |               |                       |                             |     |
| <i>E. casseliflavus</i> | <i>sodA</i>  | CA1     | TCCTGAATTAGGTGAAAAAAC  | 288 bp        | 50°C                  | AUT 14A                     | 80  |
|                         |              | CA2     | GCTAGTTTACCGTCTTTAACG  |               |                       |                             |     |
| <i>E. durans</i>        | <i>sodA</i>  | DU1     | CCTACTGATATTAAGACAGCG  | 295 bp        | 50°C                  | AUT 49B                     | 80  |
|                         |              | DU2     | TAATCCTAAGATAGGTGTTTG  |               |                       |                             |     |

**Table S2.** Description of the primer sets, annealing temperatures and DNA from control strains used for the molecular detection of *vanA*, *vanB*, *optrA*, and *cfr*

| Target genes | Primers | Sequence (5'-3')        | Amplicon size | Annealing temperature | PCR-positive control strains          | Ref. |
|--------------|---------|-------------------------|---------------|-----------------------|---------------------------------------|------|
| <i>vanA</i>  | VanA1   | AAAGTGCGAAAAACCTTGC     | 535 bp        | 54°C                  | <i>E. faecium</i> BM4                 | 83   |
|              | VanA2   | AACAACCTTACGCGGCACT     |               |                       |                                       |      |
| <i>vanB</i>  | EB3     | ACGGAATGGGAAGCCGA       | 647 bp        | 54°C                  | <i>E. faecalis</i> V583               | 84   |
|              | EB4     | TGCACCCGATTTCGTTC       |               |                       |                                       |      |
| <i>optrA</i> | optrA_F | AGGTGGTCAGCGAACTAA      | 1395 bp       | 54°C                  | <i>E. faecalis</i> INIAV 100P         | 14   |
|              | optrA_R | ATCAACTGTTCCCATTCA      |               |                       |                                       |      |
| <i>cfr</i>   | cfr_F   | TGAAGTATAAAGCAGGTTGGGGT | 746 bp        | 48°C                  | <i>Staphylococcus aureus</i> INIAV001 | 85   |
|              | cfr_R   | ACCATATAATTGACCACAGC GC |               |                       |                                       |      |
